# Supplementary material
Source: MDPI journal article supplement (https://www.mdpi.com/2071-1050/14/5/2552)
Supplement: s1 [file s1]

# Synthesis and Recyclability of Sheet-like Cobalt Carbonate Recovered from Spent Li-Ion Batteries using a Simple Hydrometallurgy Process

Abdelhay Aboulaich \*, Afaf Yaden, Nabil Elhalya, Marwa Tayoury, Mohamed Aqil, Loubna Hdidou, Mouad Dahbi and Jones Alami

## Supplementary Materials

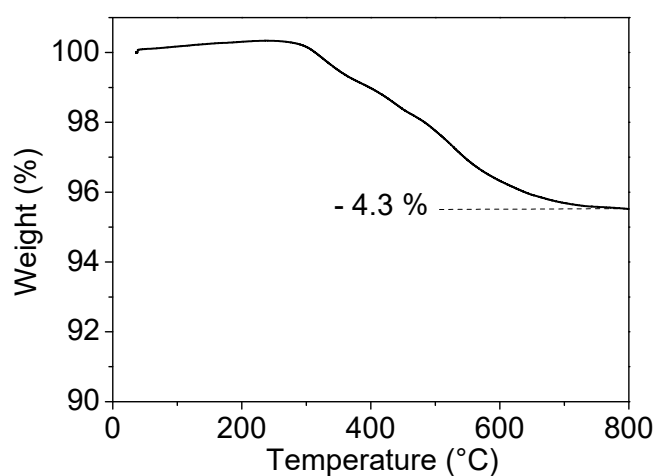

Figure S1. TGA curve of as-extracted LCO black material.

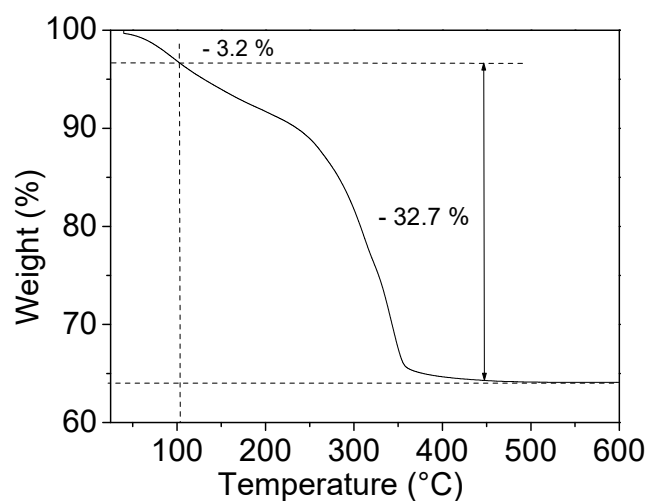

Figure S2. TGA curve of sheet-like cobalt carbonate ( $\text{CoCO}_3$ ) recovered from spent LCO battery.

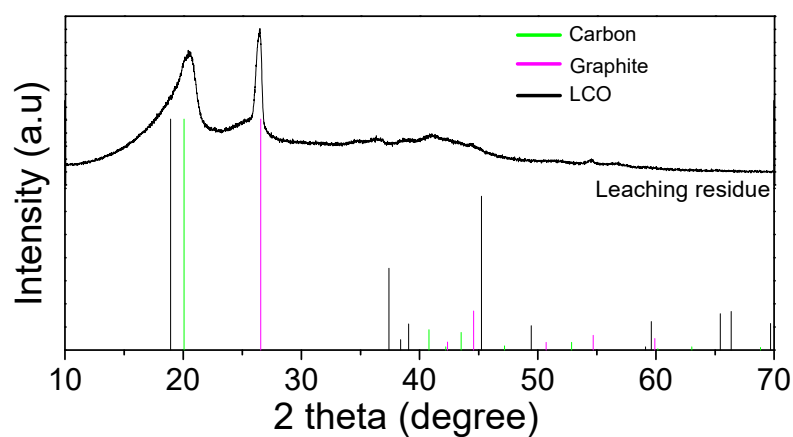

Figure S3. XRD pattern of the leaching solid residue resulting from the acid leaching step.

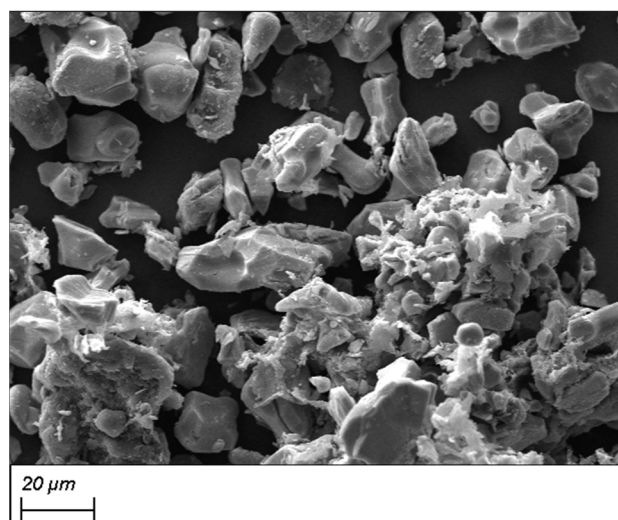

Figure S4. SEM image of LCO<sub>Com</sub> synthesized from commercial Li/Co precursors using solid-state reaction.

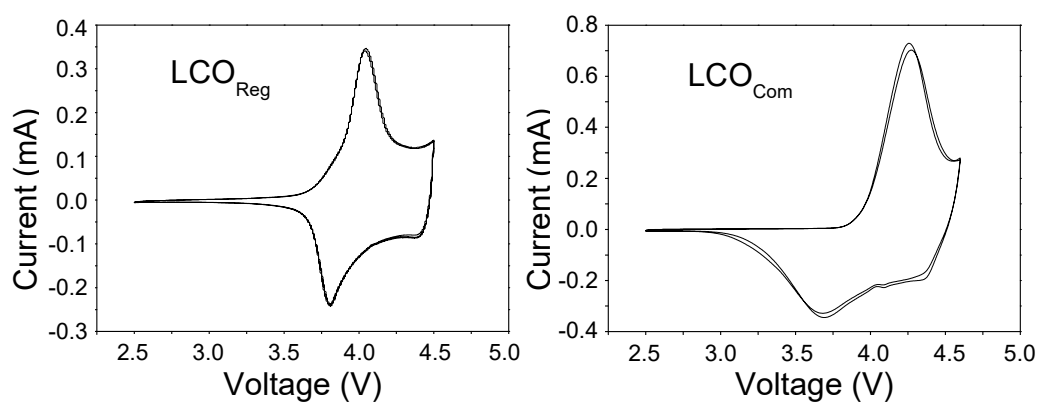

Figure S5. Cyclic voltammograms of LCO<sub>Reg</sub> and LCO<sub>Com</sub>.
